# Supplementary material
Source: publisher figshare collection journal article supplement (https://acs.figshare.com/ndownloader/files/7735465)
Supplement: Supplementary file 1 [file 7735465]

**Supporting Information:**  
**Interrogation of Base Pairing of the**  
**Spiroiminodihydantoin Diastereomers Using the**  
 **$\alpha$ -Hemolysin Latch**

Tao Zeng, Aaron M. Fleming, Yun Ding, Henry S. White,\* and Cynthia J. Burrows\*

Department of Chemistry, University of Utah, 315 South 1400 East,  
Salt Lake City, UT 84112-0850

\*To whom correspondence should be addressed:

E-mail: burrows@chem.utah.edu or white@chem.utah.edu

| <b>Content</b>                                                                                                                                               | <b>Page</b> |
|--------------------------------------------------------------------------------------------------------------------------------------------------------------|-------------|
| <b>Figure S1.</b> HPLC chromatograms of the reaction mixture and the purified oligomers containing (S)-Sp or (R)-Sp.                                         | S3          |
| <b>Figure S2.</b> Uninterrupted $i-t$ trace and corresponding duration histogram for (S)-Sp:A-containing duplex in the $\alpha$ HL nanopore.                 | S4          |
| <b>Figure S3.</b> Representative $i-t$ trace and current histogram for (S)-Sp:A-containing duplex in the $\alpha$ HL nanopore.                               | S5          |
| <b>Table S1.</b> Current blocks normalized by the open channel current.                                                                                      | S6          |
| <b>Figure S4.</b> Representative $i-t$ trace and current histogram for (R)-Sp:A-containing duplex in the $\alpha$ HL nanopore.                               | S7          |
| <b>Figure S5.</b> Additional sample of $i-t$ trace for a mixture of (S)-Sp:A- and (R)-Sp:A-containing duplexes in the $\alpha$ HL nanopore.                  | S8          |
| <b>Figure S6.</b> Representative $i-t$ trace and current histogram for (S)-Sp:A-containing duplex vs. the T:A internal standard in the $\alpha$ HL nanopore. | S9          |
| <b>Figure S7.</b> Representative $i-t$ trace and current histogram for (R)-Sp:A-containing duplex vs. the T:A internal standard in the $\alpha$ HL nanopore. | S10         |

**Figure S8.** Representative  $i-t$  trace for a mixture of (S)-Sp:G- and (R)-Sp:G-containing duplexes in the  $\alpha$ HL nanopore. S11

**Figure S9.** Representative  $i-t$  trace and current histogram for a mixture of (S)-Sp:T- and (R)-Sp:T-containing duplexes in the  $\alpha$ HL nanopore. S12

**Figure S10.** Representative  $i-t$  trace and current histogram for a mixture of (S)-Sp:C- and (R)-Sp:C-containing duplexes in the  $\alpha$ HL nanopore. S13

**Figure S11.** Representative  $i-t$  trace, current histogram, and current-noise density plot for (S)-Sp:G-containing duplex vs. the T:A internal standard in the  $\alpha$ HL nanopore. S14

**Figure S12.** Representative  $i-t$  trace, current histogram, and current-noise density plot for (R)-Sp:G-containing duplex vs. the T:A internal standard in the  $\alpha$ HL nanopore. S15

**Figure S13.** Representative  $i-t$  trace, current histogram, and current-noise density plot for (S)-Sp:T-containing duplex vs. the T:A internal standard in the  $\alpha$ HL nanopore. S16

**Figure S14.** Representative  $i-t$  trace, current histogram, and current-noise density plot for (R)-Sp:T-containing duplex vs. the T:A internal standard in the  $\alpha$ HL nanopore. S17

**Figure S15.** Representative  $i-t$  trace, current histogram, and current-noise density plot for (S)-Sp:C-containing duplex vs. the T:A internal standard in the  $\alpha$ HL nanopore. S18

**Figure S16.** Representative  $i-t$  trace, current histogram, and current-noise density plot for (R)-Sp:C-containing duplex vs. the T:A internal standard in the  $\alpha$ HL nanopore. S19

**Figure S17.** Representative  $i-t$  trace and current histogram for G:C-containing duplex vs. the T:A internal standard in the  $\alpha$ HL nanopore. S20

**Figure S18.** Representative  $i-t$  trace and current histogram for OG:C-containing duplex vs. the T:A internal standard in the  $\alpha$ HL nanopore. S21

**Figure S19.** Melting curves for the duplexes containing G:C, (S)-Sp:C, or (R)-Sp:C base pair. S22

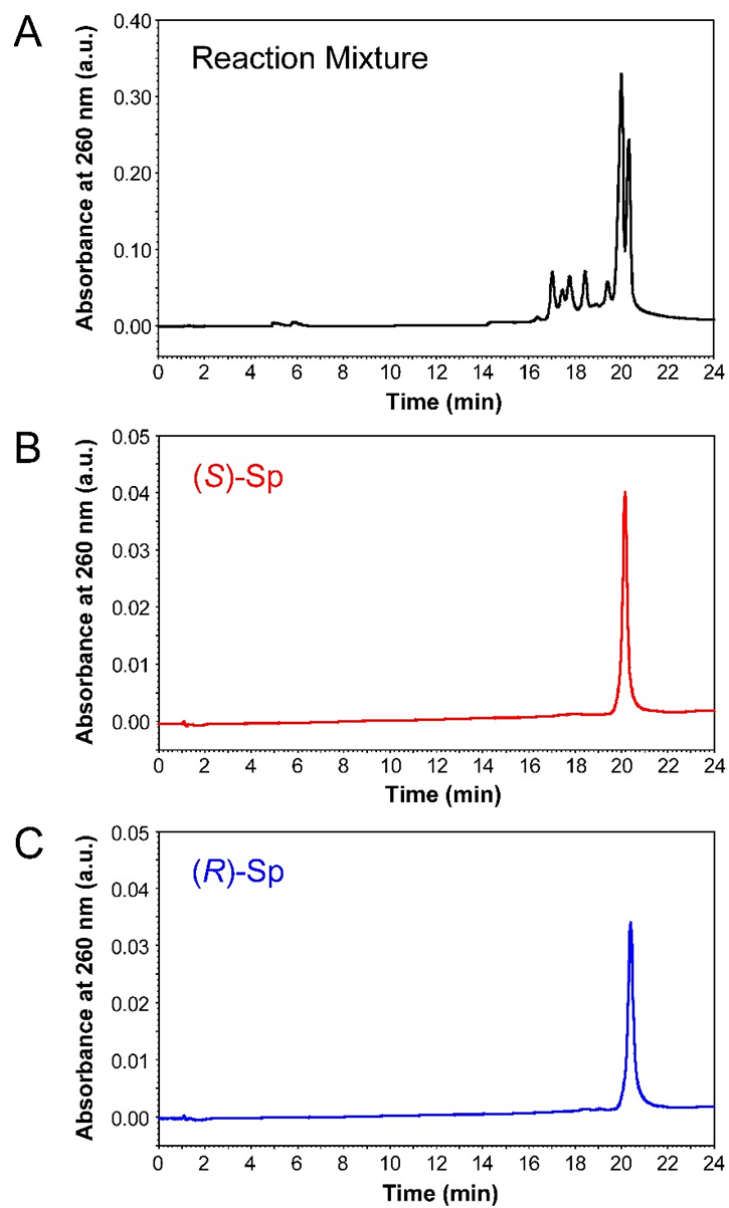

**Figure S1.** HPLC chromatograms of the reaction mixture (A, black) and the purified oligomers containing (S)-Sp (B, red) or (R)-Sp (C, blue).

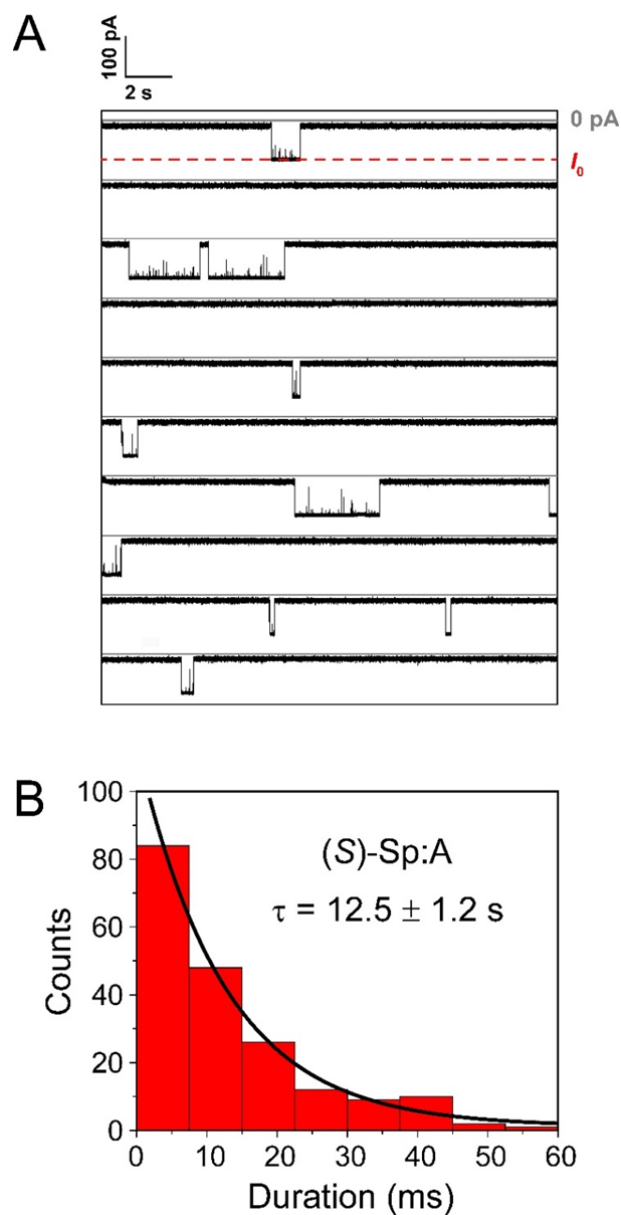

**Figure S2.** Uninterrupted  $i$ - $t$  trace (A) and corresponding duration histogram (B) for (S)-Sp:A-containing duplex in the  $\alpha$ HL nanopore. The unzipping lifetime ( $\tau$ ) was obtained by fitting the duration histogram (B) with a first order exponential decay function (the error is based on three individual experiments, in which each experiment comprised over 200 events). Typically, the duplex structure stays inside the  $\alpha$ HL channel for tens of seconds before unzipping. The traces were recorded in 1.00 M KCl, 10 mM  $\text{KP}_i$ , pH 7.4 at 100 mV (*trans* vs. *cis*) and  $22 \pm 1$  °C.

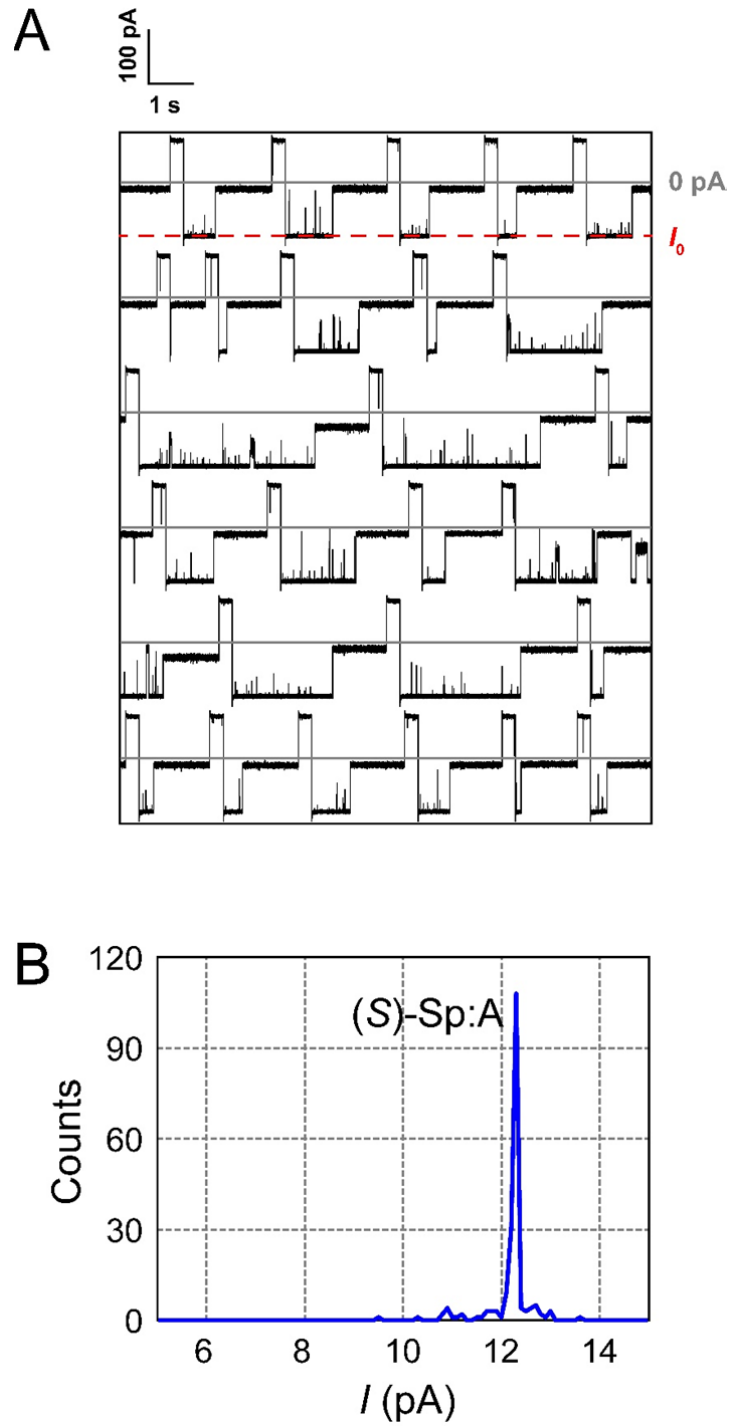

**Figure S3.** Representative  $i$ - $t$  trace (A) and current histogram (B) for (S)-Sp:A-containing duplex in the  $\alpha$ HL nanopore. The single peak in the current histogram supports a predominant base pairing configuration between (S)-Sp and A. The traces were recorded in 1.00 M KCl, 10 mM  $\text{KP}_i$ , pH 7.4 at 100 mV (*trans* vs. *cis*) and  $22 \pm 1$  °C.

**Table S1.** Current blocks normalized by the open channel current. The data were obtained in 1.00 M KCl, 10 mM KPi, pH 7.4 at 100 mV (*trans* vs. *cis*) and  $22 \pm 1$  °C.

| Analyte                                 | $\Delta I/I_0$    |
|-----------------------------------------|-------------------|
| ( <i>R</i> )-Sp:A vs. ( <i>S</i> )-Sp:A | $0.004 \pm 0.001$ |
| ( <i>R</i> )-Sp:G vs. ( <i>S</i> )-Sp:G | $0.008 \pm 0.001$ |
| ( <i>R</i> )-Sp:T vs. ( <i>S</i> )-Sp:T | $0.004 \pm 0.001$ |
| ( <i>R</i> )-Sp:C vs. ( <i>S</i> )-Sp:C | $0.003 \pm 0.001$ |
| ( <i>S</i> )-Sp:A vs. T:A               | $0.026 \pm 0.001$ |
| ( <i>R</i> )-Sp:A vs. T:A               | $0.029 \pm 0.001$ |
| ( <i>S</i> )-Sp:G vs. T:A               | $0.022 \pm 0.002$ |
| ( <i>R</i> )-Sp:G vs. T:A               | $0.029 \pm 0.001$ |
| ( <i>S</i> )-Sp:T vs. T:A               | $0.022 \pm 0.002$ |
| ( <i>R</i> )-Sp:T vs. T:A               | $0.025 \pm 0.002$ |
| ( <i>S</i> )-Sp:C vs. T:A               | $0.021 \pm 0.001$ |
| ( <i>R</i> )-Sp:C vs. T:A               | $0.022 \pm 0.001$ |

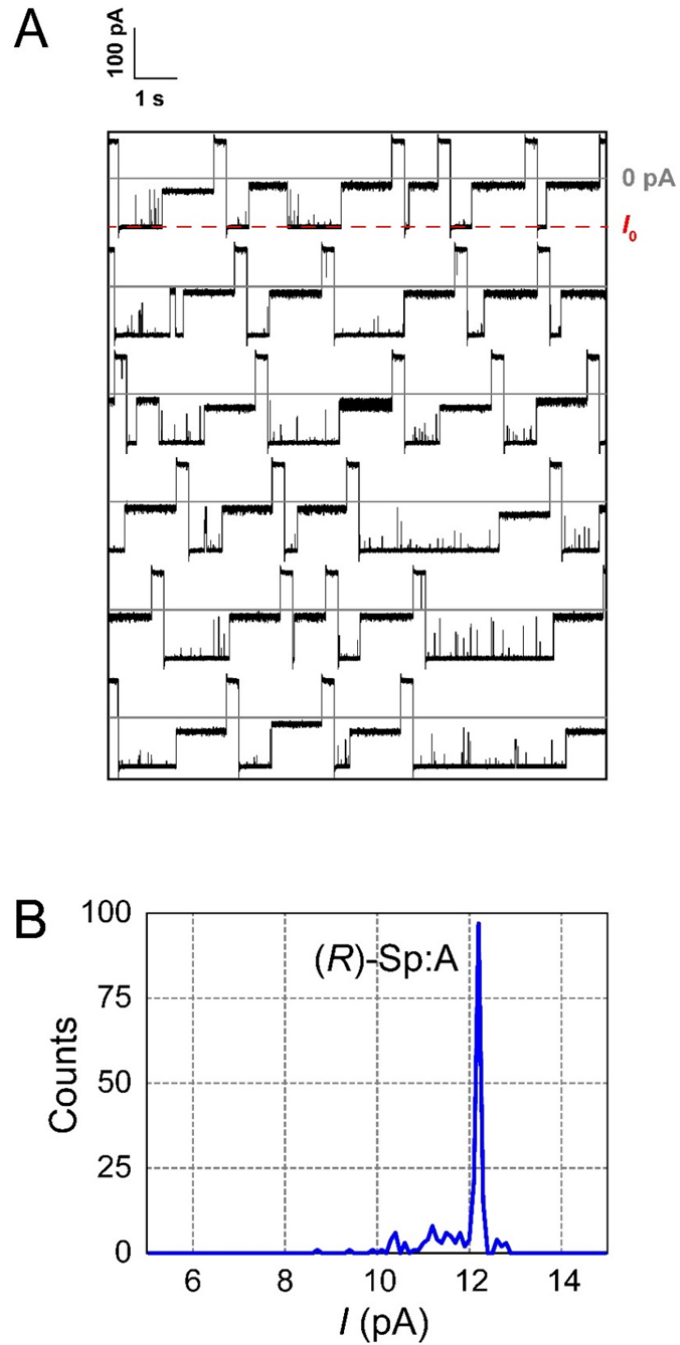

**Figure S4.** Representative  $i$ - $t$  trace (A) and current histogram (B) for (R)-Sp:A-containing duplex in the  $\alpha$ HL nanopore. The single peak in the current histogram supports a predominant base pairing configuration between (R)-Sp and A, similar to the base pair S-Sp:A (Figure S3). The traces were recorded in 1.00 M KCl, 10 mM  $KP_i$ , pH 7.4 at 100 mV (*trans* vs. *cis*) and  $22 \pm 1$  °C.

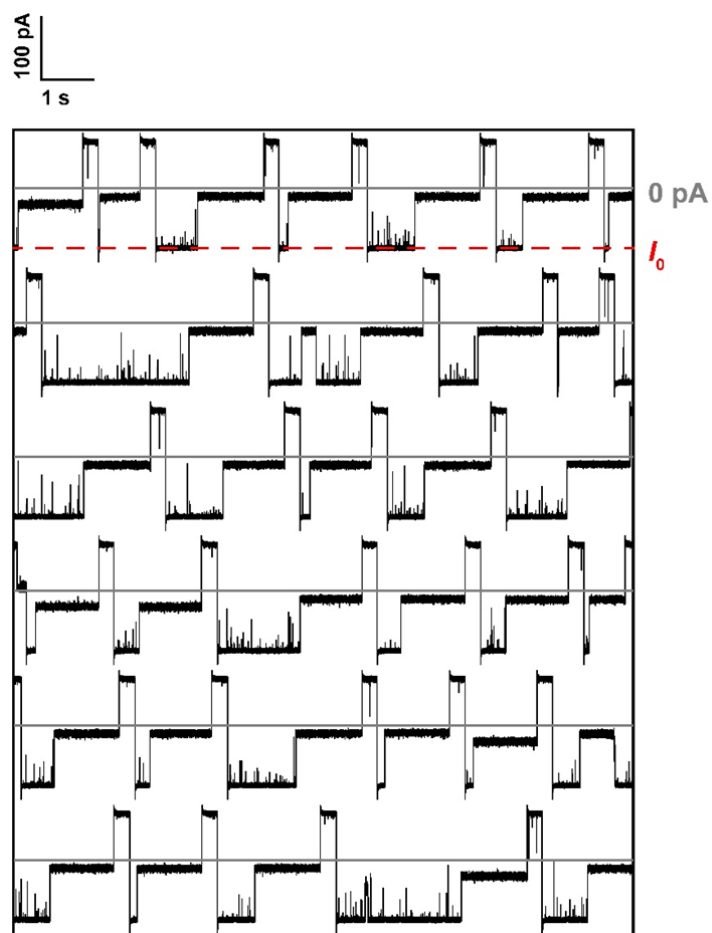

**Figure S5.** Additional sample of  $i-t$  trace for a mixture of (S)-Sp:A- and (R)-Sp:A-containing duplexes in the  $\alpha$ HL nanopore. The traces were recorded in 1.00 M KCl, 10 mM  $\text{KPi}$ , pH 7.4 at 100 mV (*trans* vs. *cis*) and  $22 \pm 1$  °C. These data were used to construct the current histogram and current-noise density plot shown in Figure 4C and Figure 4D of the main text.



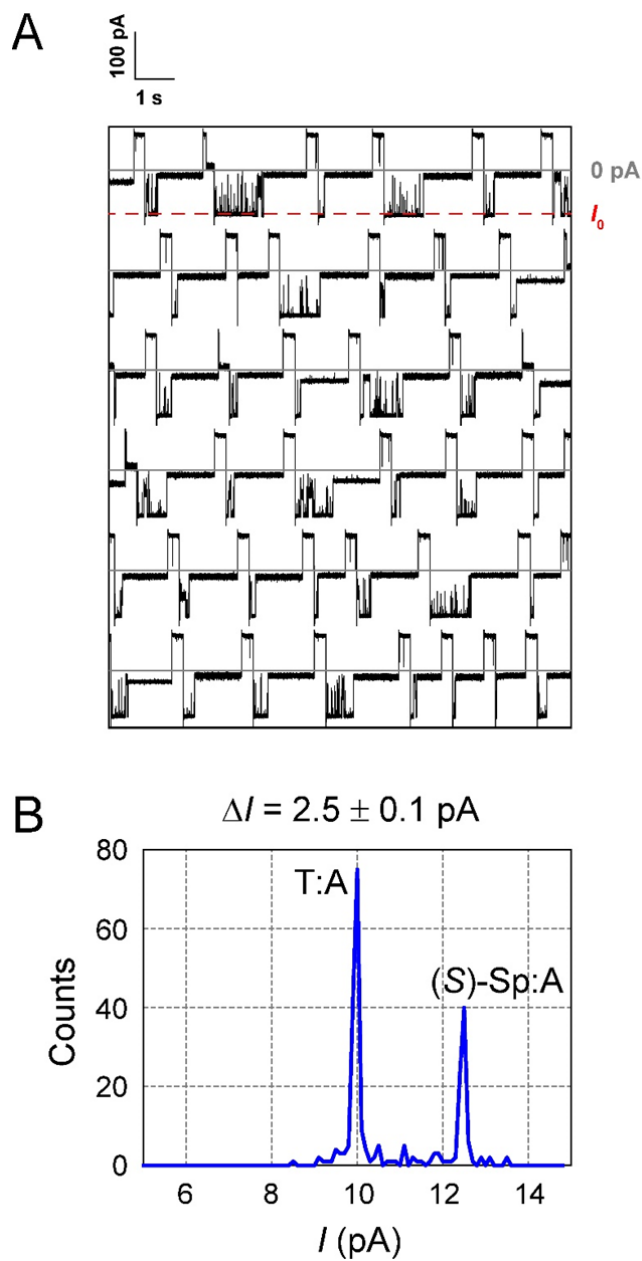

**Figure S6.** Representative  $i$ - $t$  trace (A) and current histogram (B) for (S)-Sp:A-containing duplex vs. the T:A internal standard in the  $\alpha$ HL nanopore. The 2:1 peak ratio reflects the twofold greater concentration of the T:A standard. The current difference between (S)-Sp:A duplex and the T:A internal standard is  $2.5 \pm 0.1$  pA (the error is based on three individual experiments, in which each experiment comprised over 200 events). The traces were recorded in 1.00 M KCl, 10 mM  $KP_i$ , pH 7.4 at 100 mV (*trans* vs. *cis*) and  $22 \pm 1$  °C.

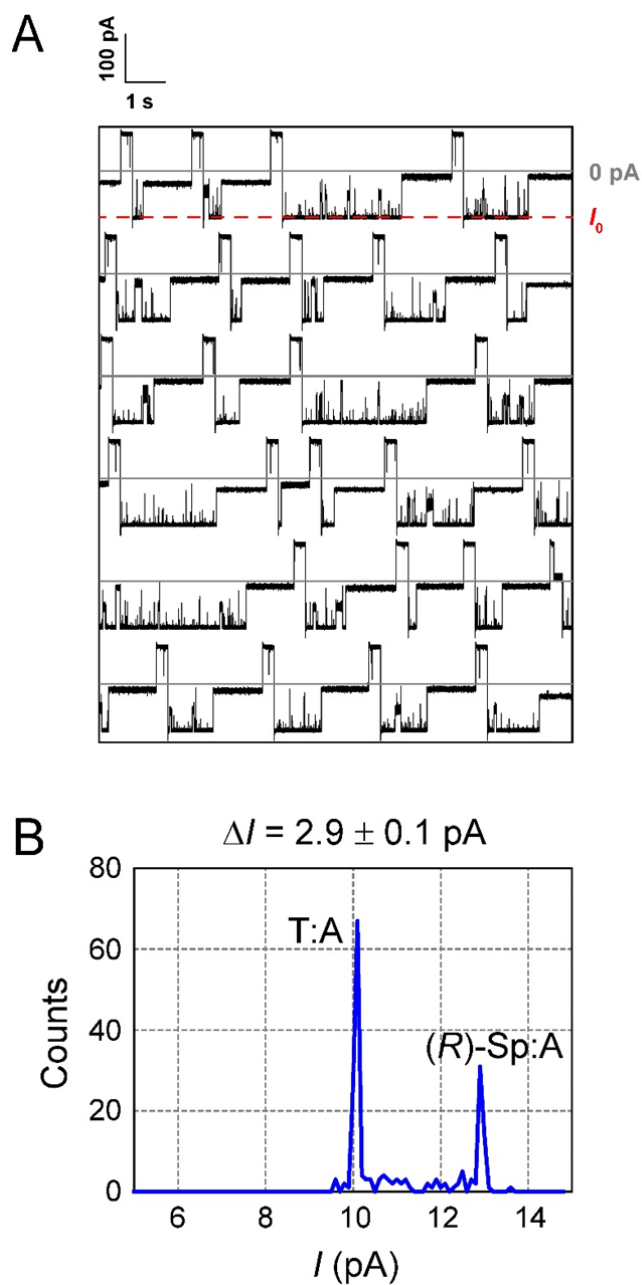

**Figure S7.** Representative  $i$ - $t$  trace (A) and current histogram (B) for (R)-Sp:A-containing duplex vs. the T:A internal standard in the  $\alpha$ HL nanopore. The 2:1 peak ratio reflects the twofold greater concentration of the T:A standard. The current difference between (R)-Sp:A duplex and the T:A internal standard is  $2.9 \pm 0.1$  pA (the error is based on three individual experiments, in which each experiment comprised over 200 events). The traces were recorded in 1.00 M KCl, 10 mM  $KP_i$ , pH 7.4 at 100 mV (*trans* vs. *cis*) and  $22 \pm 1$  °C.

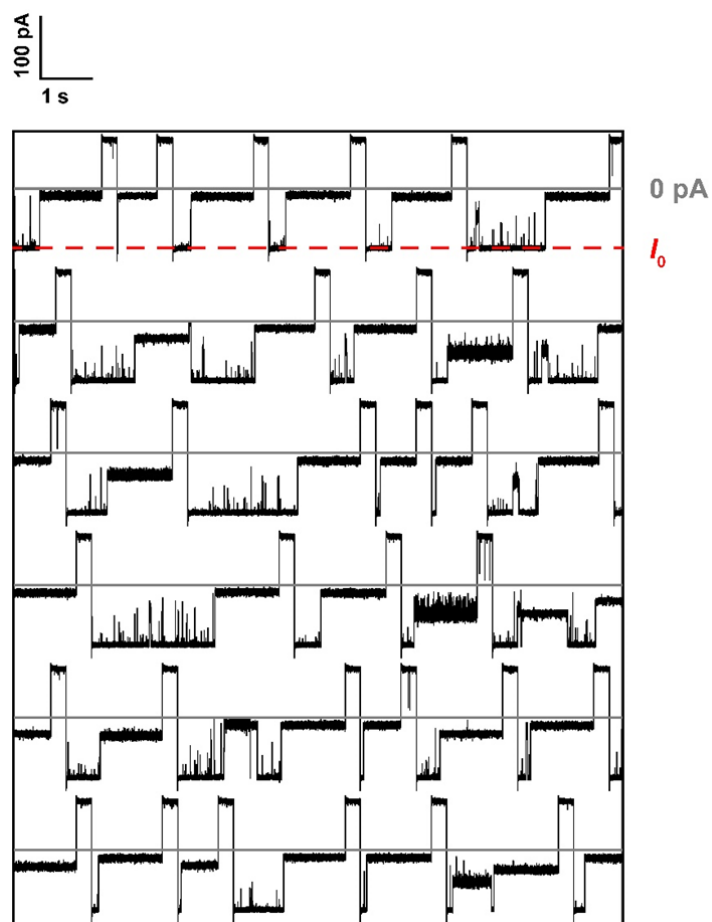

**Figure S8.** Representative  $i$ - $t$  trace for a mixture of (S)-Sp:G- and (R)-Sp:G-containing duplexes in the  $\alpha$ HL nanopore. The traces were recorded in 1.00 M KCl, 10 mM  $\text{KP}_i$ , pH 7.4 at 100 mV (*trans* vs. *cis*) and  $22 \pm 1$  °C. These data were used to construct the current histogram shown in Fig 5A of the main text.

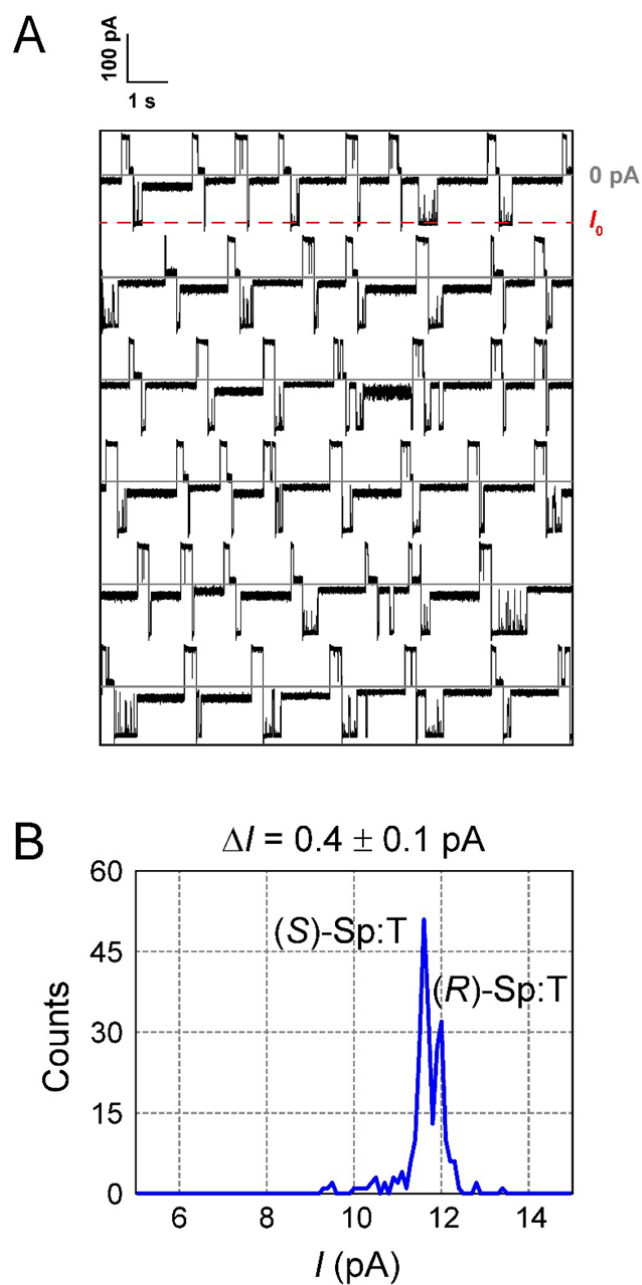

**Figure S9.** Representative  $i$ - $t$  trace (A) and current histogram (B) for a mixture of (S)-Sp:T- and (R)-Sp:T-containing duplexes in the  $\alpha$ HL nanopore. The 2:1 peak ratio reflects the twofold greater concentration of (S)-Sp:T duplex. The current difference between (S)-Sp:T and (R)-Sp:T duplexes is  $0.4 \pm 0.1$  pA (the error is based on three individual experiments, in which each experiment comprised over 200 events). The traces were recorded in 1.00 M KCl, 10 mM  $\text{KP}_i$ , pH 7.4 at 100 mV (*trans* vs. *cis*) and  $22 \pm 1$  °C.

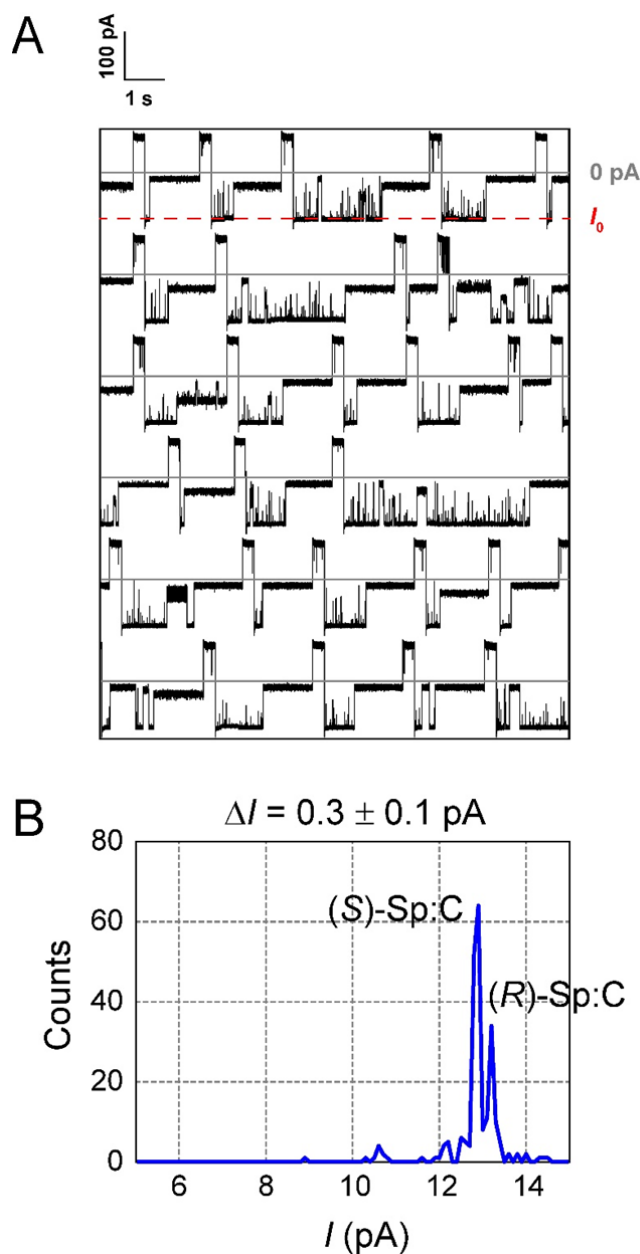

**Figure S10.** Representative  $i-t$  trace (A) and current histogram (B) for a mixture of (S)-Sp:C- and (R)-Sp:C-containing duplexes in the  $\alpha$ HL nanopore. The 2:1 peak ratio reflects the twofold greater concentration of (S)-Sp:C duplex. The current difference between (S)-Sp:C and (R)-Sp:C duplexes is  $0.3 \pm 0.1$  pA (the error is based on three individual experiments, in which each experiment comprised over 200 events). The traces were recorded in 1.00 M KCl, 10 mM  $\text{KP}_i$ , pH 7.4 at 100 mV (*trans* vs. *cis*) and  $22 \pm 1$  °C.

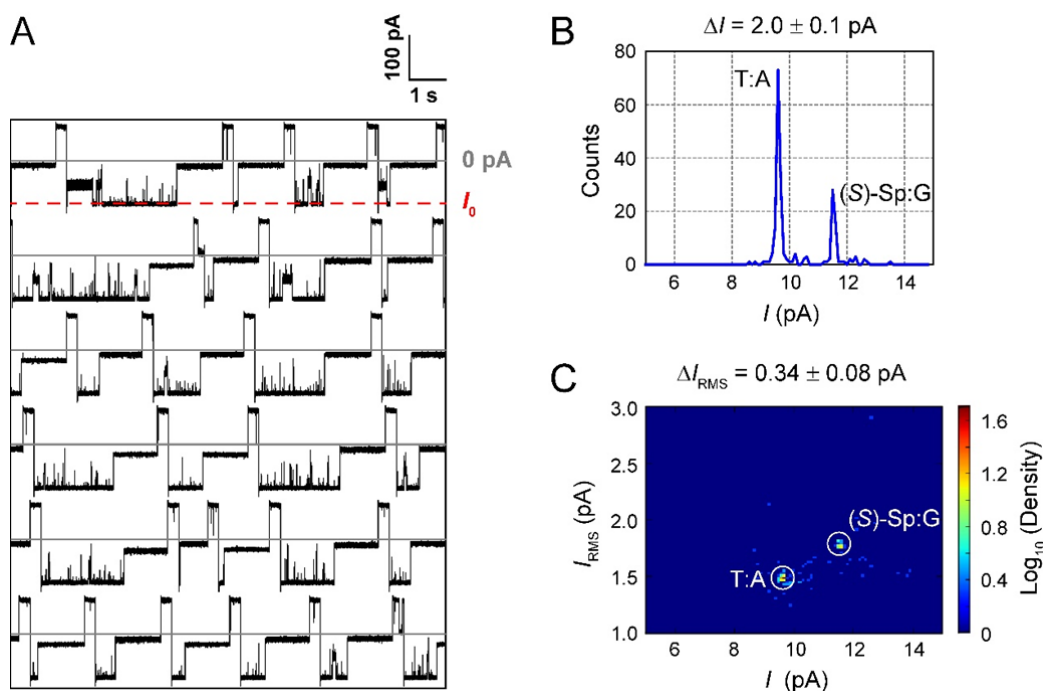

**Figure S11.** Representative  $i-t$  trace (A), current histogram (B), and current-noise density plot (C) for (S)-Sp:G-containing duplex vs. the T:A internal standard in the  $\alpha$ HL nanopore. The 2:1 peak ratio in the current histogram reflects the twofold greater concentration of the T:A standard. The current (B) and noise (C) differences between (S)-Sp:G duplex and the T:A internal standard are  $2.0 \pm 0.1$  pA and  $0.34 \pm 0.08$  pA, respectively (the errors are based on three individual experiments, in which each experiment comprised over 200 events). The traces were recorded in 1.00 M KCl, 10 mM  $\text{KP}_i$ , pH 7.4 at 100 mV (*trans* vs. *cis*) and  $22 \pm 1$  °C.

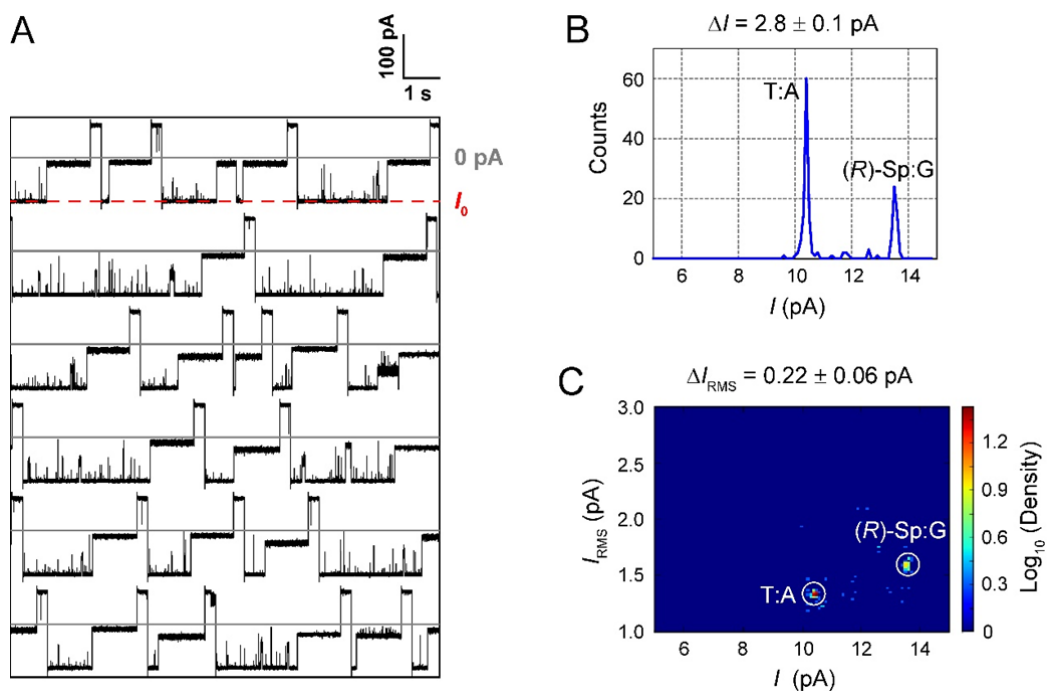

**Figure S12.** Representative  $i-t$  trace (A), current histogram (B), and current-noise density plot (C) for  $R$ -Sp:G-containing duplex vs. the T:A internal standard in the  $\alpha$ HL nanopore. The 2:1 peak ratio in the current histogram reflects the twofold greater concentration of the T:A standard. The current (B) and noise (C) differences between  $R$ -Sp:G duplex and the T:A internal standard are  $2.8 \pm 0.1$  pA and  $0.22 \pm 0.06$  pA, respectively (the errors are based on three individual experiments, in which each experiment comprised over 200 events). The traces were recorded in 1.00 M KCl, 10 mM  $\text{KP}_i$ , pH 7.4 at 100 mV (*trans* vs. *cis*) and  $22 \pm 1$  °C.

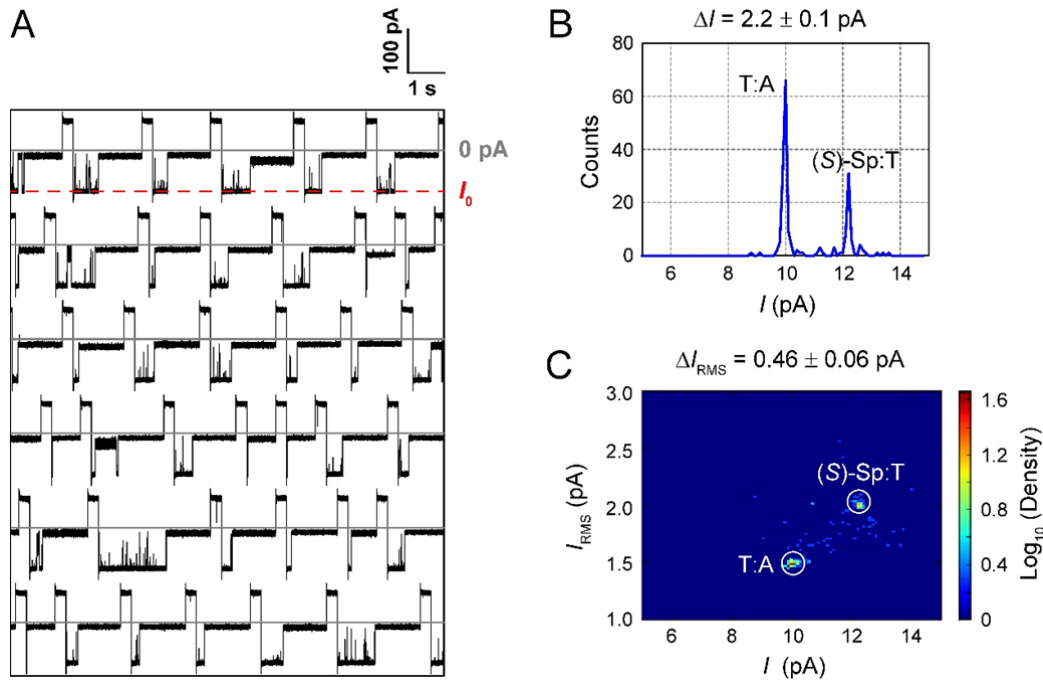

**Figure S13.** Representative  $i-t$  trace (A), current histogram (B), and current-noise density plot (C) for (S)-Sp:T-containing duplex vs. the T:A internal standard in the  $\alpha$ HL nanopore. The 2:1 peak ratio in the current histogram reflects the twofold greater concentration of the T:A standard. The current (B) and noise (C) differences between (S)-Sp:T duplex and the T:A internal standard are  $2.2 \pm 0.1$  pA and  $0.46 \pm 0.06$  pA, respectively (the errors are based on three individual experiments, in which each experiment comprised over 200 events). The traces were recorded in 1.00 M KCl, 10 mM  $\text{KP}_i$ , pH 7.4 at 100 mV (*trans* vs. *cis*) and  $22 \pm 1$  °C.



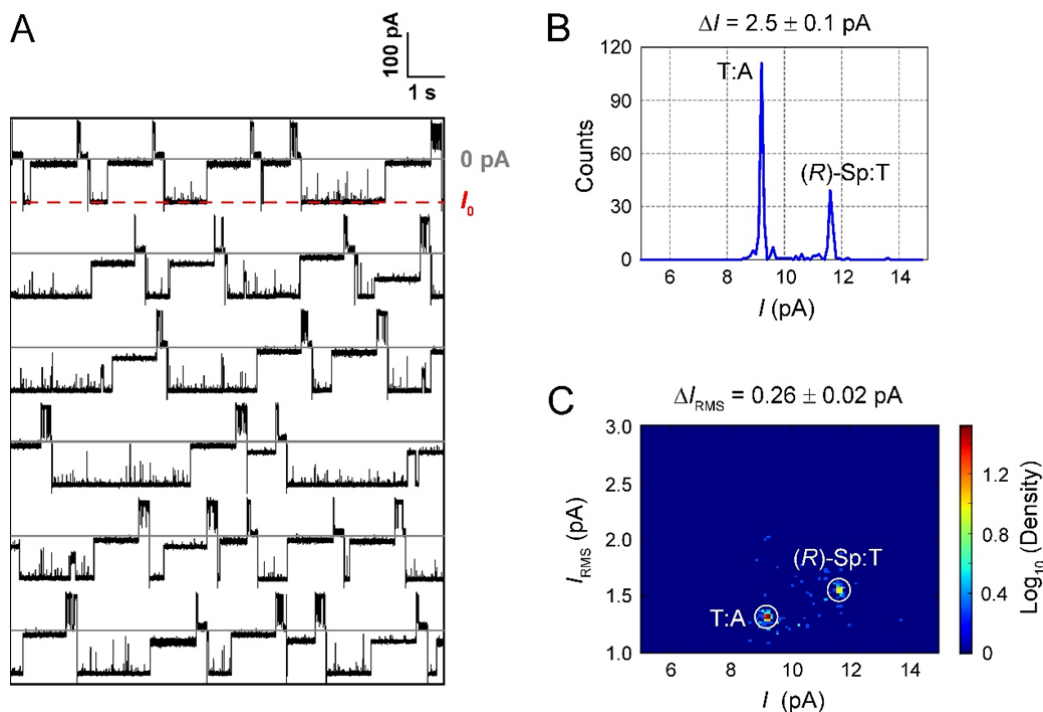

**Figure S14.** Representative  $i-t$  trace (A), current histogram (B), and current-noise density plot (C) for (R)-Sp:T-containing duplex vs. the T:A internal standard in the  $\alpha$ HL nanopore. The 2:1 peak ratio in the current histogram reflects the twofold greater concentration of the T:A standard. The current (B) and noise (C) differences between (R)-Sp:T duplex and the T:A internal standard are  $2.5 \pm 0.1$  pA and  $0.26 \pm 0.02$  pA, respectively (the errors are based on three individual experiments, in which each experiment comprised over 200 events). The traces were recorded in 1.00 M KCl, 10 mM  $\text{KP}_i$ , pH 7.4 at 100 mV (*trans* vs. *cis*) and  $22 \pm 1$  °C.

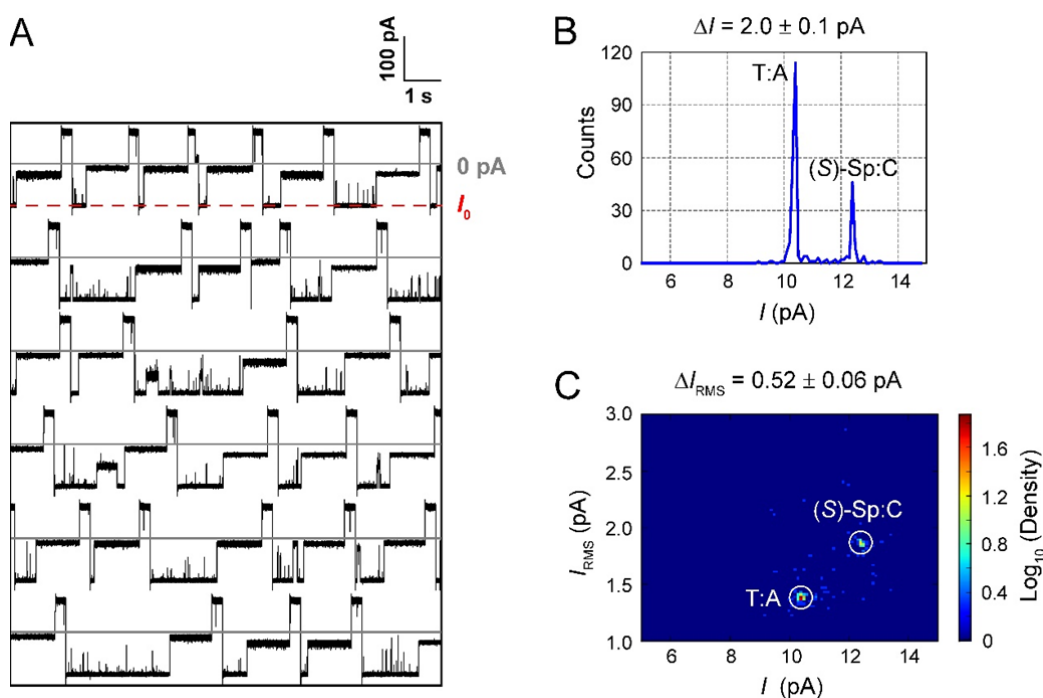

**Figure S15.** Representative  $i-t$  trace (A), current histogram (B), and current-noise density plot (C) for (S)-Sp:C-containing duplex vs. the T:A internal standard in the  $\alpha$ HL nanopore. The 2:1 peak ratio in the current histogram reflects the twofold greater concentration of the T:A standard. The current (B) and noise (C) differences between (S)-Sp:C duplex and the T:A internal standard are  $2.0 \pm 0.1$  pA and  $0.52 \pm 0.06$  pA, respectively (the errors are based on three individual experiments, in which each experiment comprised over 200 events). The traces were recorded in 1.00 M KCl, 10 mM  $\text{KP}_i$ , pH 7.4 at 100 mV (*trans* vs. *cis*) and  $22 \pm 1$  °C.

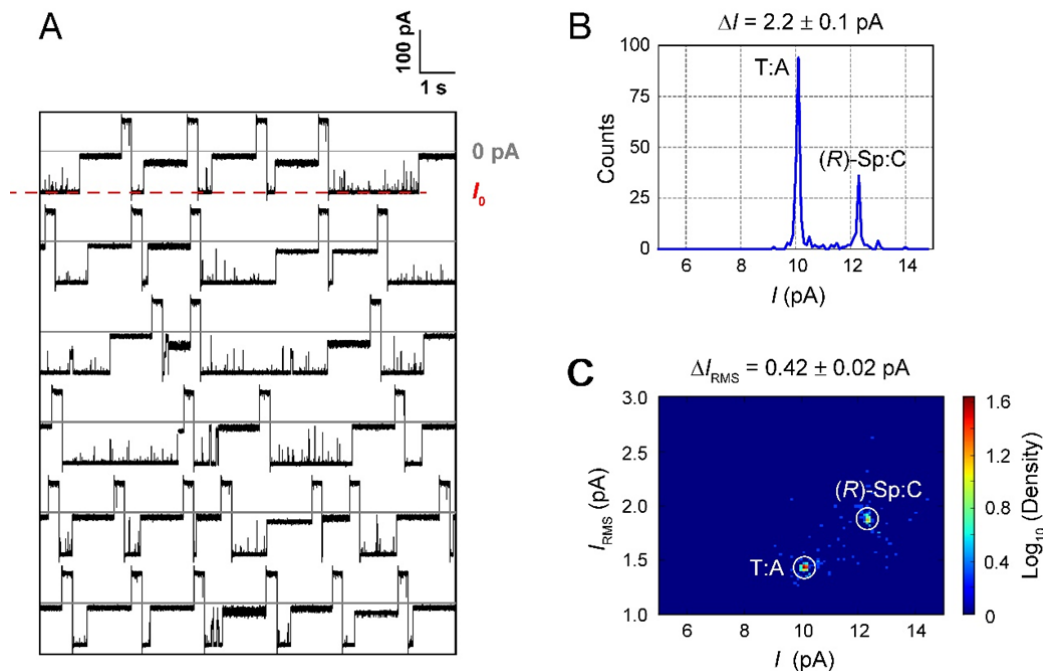

**Figure S16.** Representative  $i-t$  trace (A), current histogram (B), and current-noise density plot (C) for (R)-Sp:C-containing duplex vs. the T:A internal standard in the  $\alpha$ HL nanopore. The 2:1 peak ratio in the current histogram reflects the twofold greater concentration of the T:A standard. The current (B) and noise (C) differences between (R)-Sp:C duplex and the T:A internal standard are  $2.2 \pm 0.1$  pA and  $0.42 \pm 0.02$  pA, respectively (the errors are based on three individual experiments, in which each experiment comprised over 200 events). The traces were recorded in 1.00 M KCl, 10 mM  $\text{KP}_i$ , pH 7.4 at 100 mV (*trans* vs. *cis*) and  $22 \pm 1$  °C.

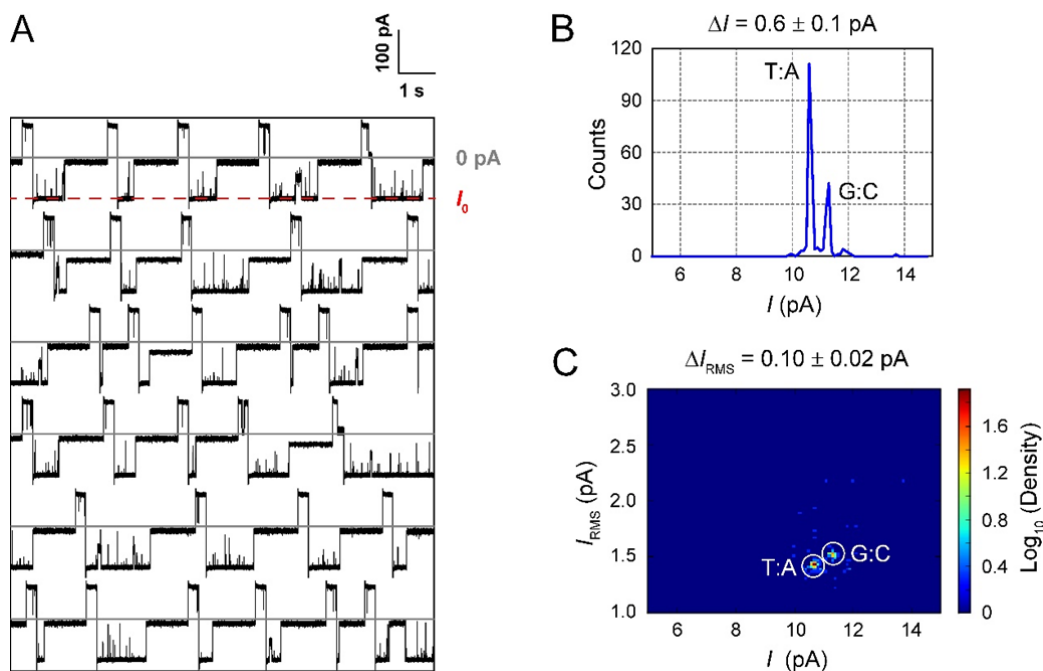

**Figure S17.** Representative  $i-t$  trace (A), current histogram (B), and current-noise density plot (C) for G:C-containing duplex vs. the T:A internal standard in the  $\alpha$ HL nanopore. The 2:1 peak ratio in the current histogram reflects the twofold greater concentration of the T:A standard. The current (B) and noise (C) differences between G:C duplex and the T:A internal standard are  $0.6 \pm 0.1$  pA and  $0.10 \pm 0.02$  pA, respectively (the errors are based on three individual experiments, in which each experiment comprised over 200 events). The traces were recorded in 1.00 M KCl, 10 mM  $\text{KPi}$ , pH 7.4 at 100 mV (*trans* vs. *cis*) and  $22 \pm 1$  °C.

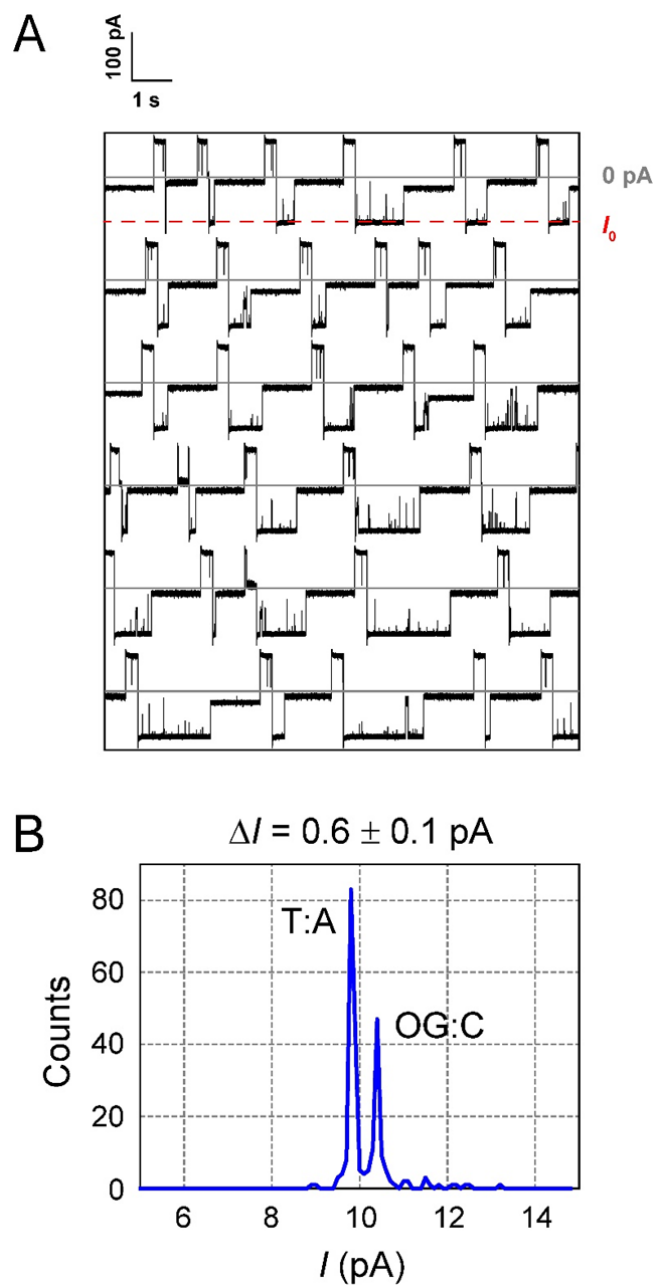

**Figure S18.** Representative  $i$ - $t$  trace (A) and current histogram (B) for OG:C-containing duplex vs. the T:A internal standard in the  $\alpha$ HL nanopore. The 2:1 peak ratio reflects the twofold greater concentration of the T:A standard. The current difference between OG:C duplex and the T:A internal standard is  $0.6 \pm 0.1$  pA (the error is based on three individual experiments, in which each experiment comprised over 200 events). The traces were recorded in 1.00 M KCl, 10 mM  $\text{KP}_i$ , pH 7.4 at 100 mV (*trans* vs. *cis*) and  $22 \pm 1$  °C.

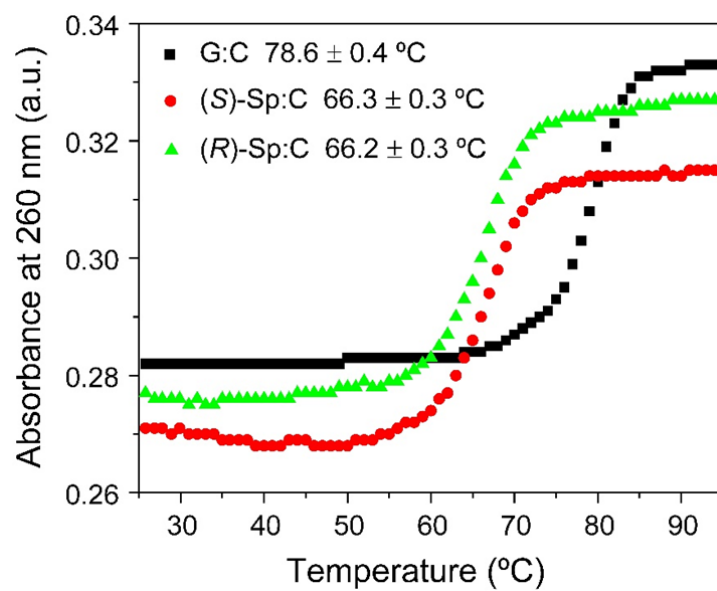

**Figure S19.** Melting curves for the duplexes containing G:C (black square), (S)-Sp:C (red circle), or (R)-Sp:C (green triangle) base pair. The data were collected in 1.00 M KCl, 10 mM KPi, pH 7.4 with a DNA concentration of 0.75  $\mu$ M. Note that the (CAT)<sub>10</sub> tail was removed from the sequences in the  $T_m$  experiments.
